# Supplementary material
Source: Springer Nature journal article supplement (https://www.springermedizin.de/resource/supplementary/12889_2011_3814_MOESM1_ESM.pdf/9492084)
Supplement: MOESM1 [file 9492084]

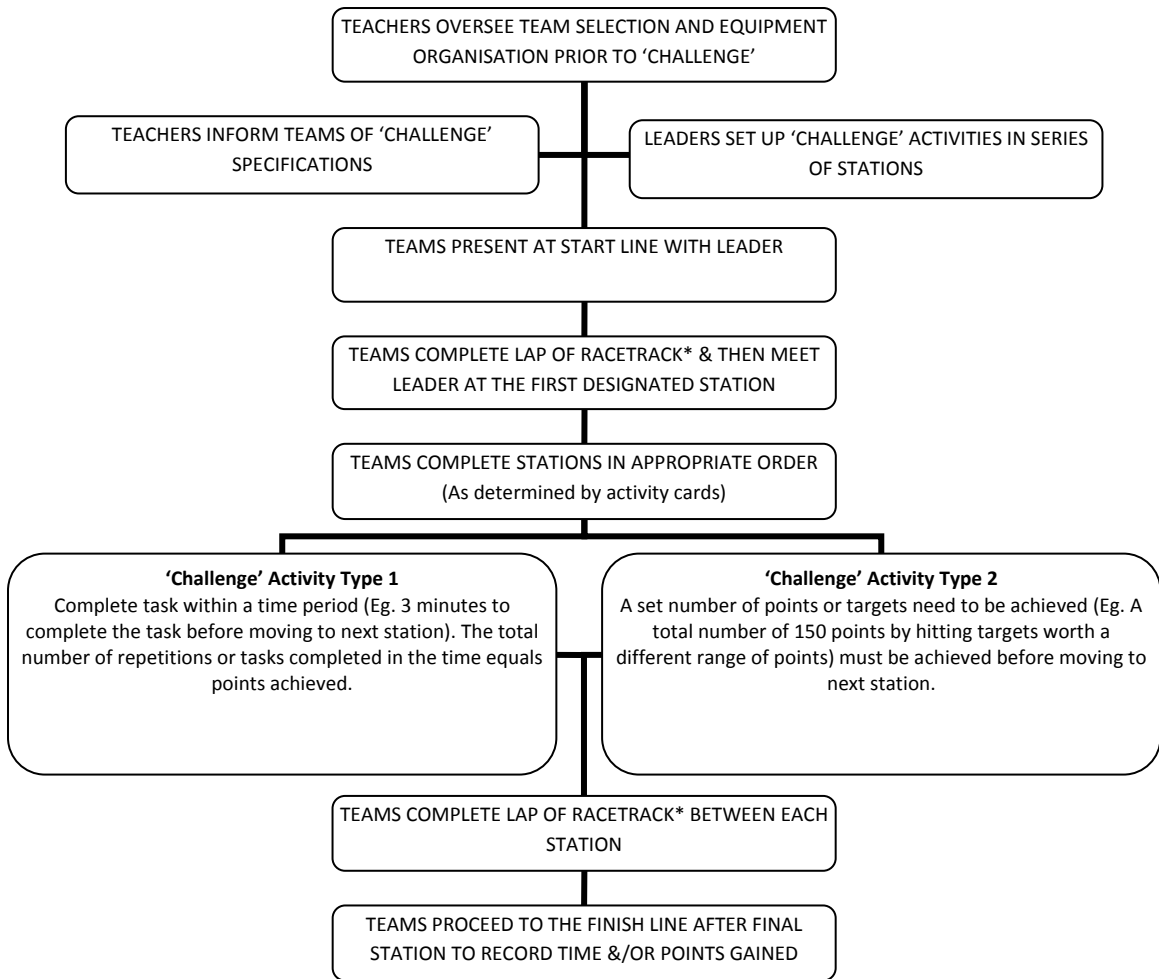

*Note: \*Racetrack is a circuit of approximately 20-30metres in distance. Its intention is to provide the leaders time to move to the next station and prepare for their teams arrival when they need to explain the next task. The racetrack also provides additional physical activity between each station which is important during the more cognitively directed challenges.*
